# Supplementary material for: The Prevalence of MRI-Defined Sacroiliitis and Classification of Spondyloarthritis in Patients with Acute Anterior Uveitis: A Longitudinal Single-Centre Cohort Study
Source: MDPI journal article supplement (doi:10.3390/diagnostics12010161), 2022-01-11
Supplement: s1 [file s1]

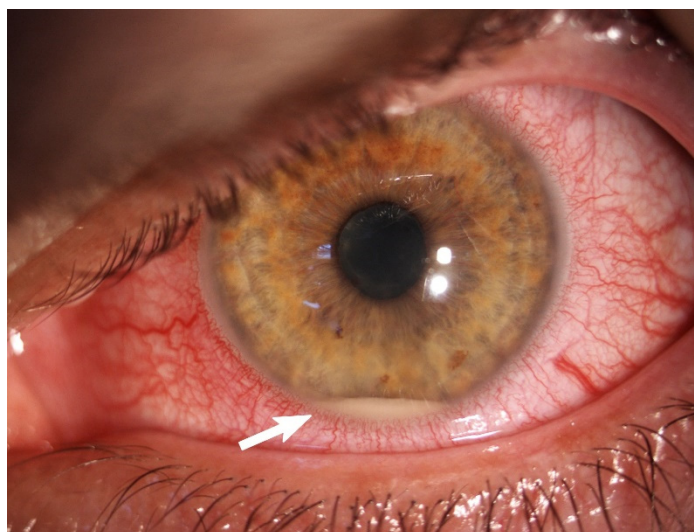

**Supplementary Figure S1.** Acute anterior uveitis of the left eye. Mixed conjunctival and ciliary injection, sedimentation of inflammatory material in the anterior chamber—hypopyon (arrow).

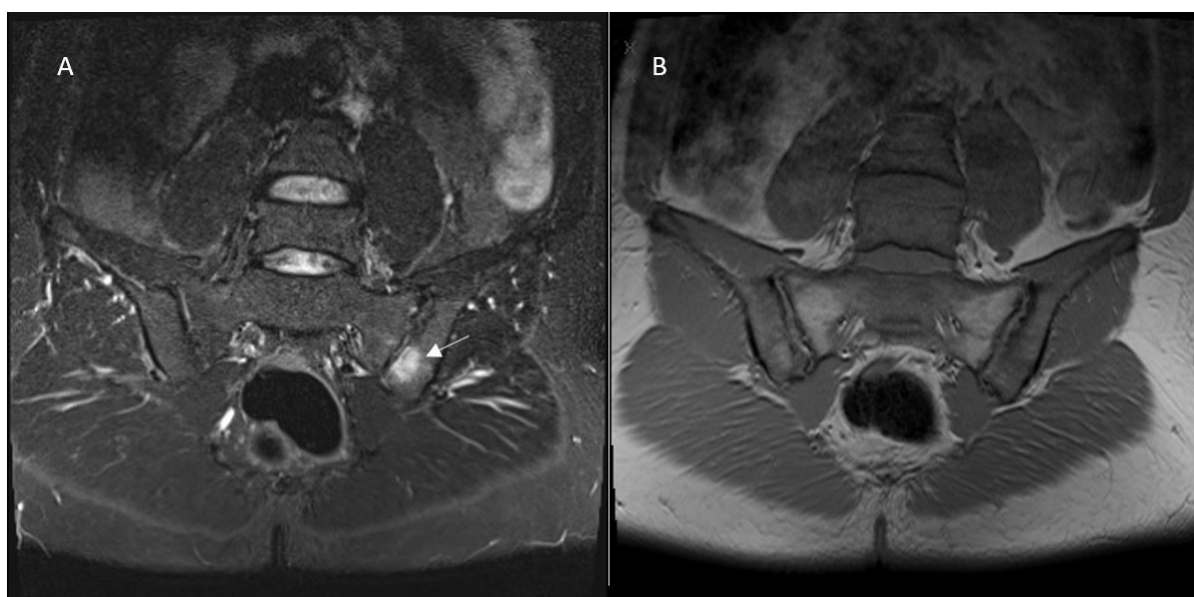

**Supplementary Figure S2.** (A). STIR: Bone marrow edema on the iliac part of left sacroiliac joint which is highly suggestive of axSpA. (B). Corresponding T1W image.
